# Supplementary material for: The role of fluid pressure in induced vs. triggered seismicity: insights from rock deformation experiments on carbonates
Source: PubMed Central journal article supplement (PMC4845004; doi:10.1038/srep24852), 2016-04-26
Supplement: srep24852-s1.pdf [file srep24852-s1.pdf]

**The role of fluid pressure in induced vs. triggered seismicity: insights  
from rock deformation experiments on carbonates**

Marco M. Scuderi<sup>1,2\*</sup> and Cristiano Collettini<sup>1,2</sup>

<sup>1</sup>*Dipartimento di Scienze della Terra, Sapienza Università di Roma, Piazz. Aldo Moro 5, 00187 Rome, Italy*

<sup>2</sup>*Istituto Nazionale di Geofisica e Vulcanologia, INGV, via di Vigna Murata 605, 00143 Rome, Italy*

\* *Corresponding author: marco.scuderi@uniroma1.it*

**Supplementary Material**  
**Contains Extended Data Figure 1, 2, 3**

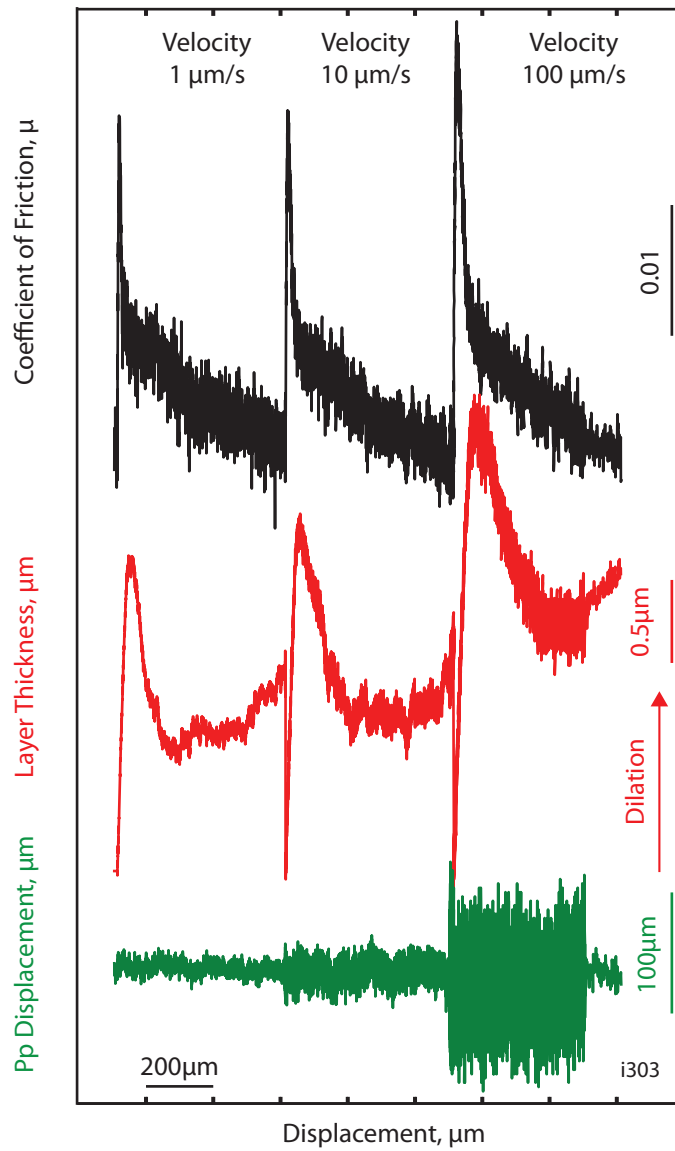

**Extended Data Figure 1.** Experimental curves showing the evolution of friction (black) layer thickness (red) and up-stream pore fluid pressure displacement (green) during a series of velocity steps from 0.1 to 100  $\mu\text{m/s}$ .

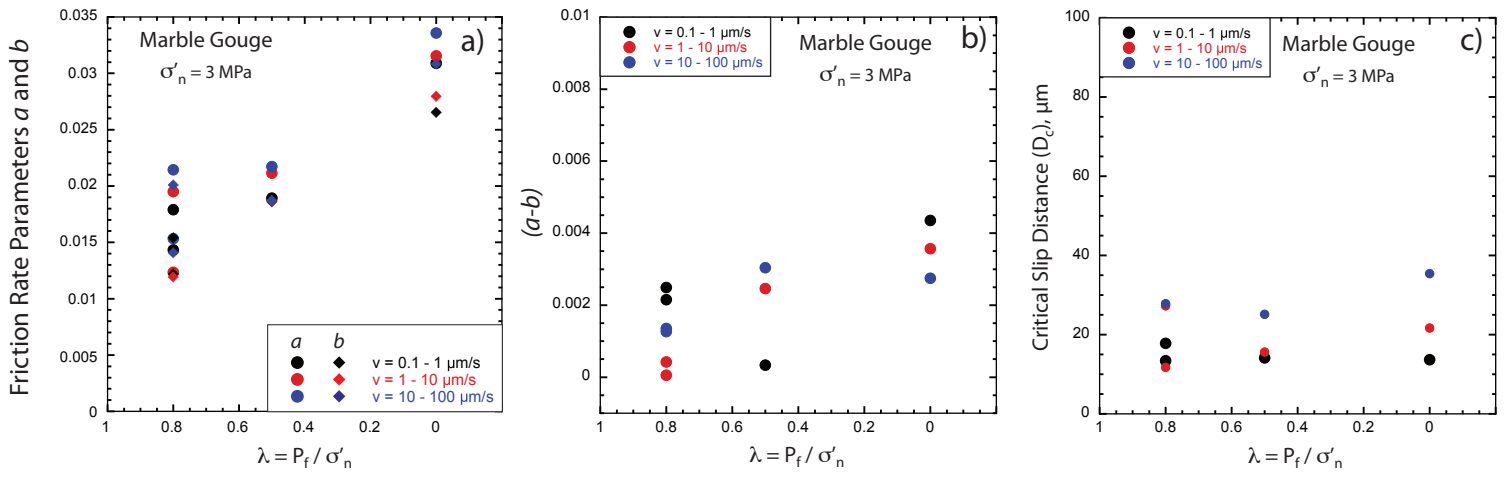

**Extended Data Figure 2.** (a) Friction rate parameters  $a$  and  $b$ ; (b)  $(a-b)$  and (c)  $D_c$  obtained for the same effective normal stress (3 MPa) but at different fluid pressure levels as expressed by the pore fluid factor,  $\lambda$ .

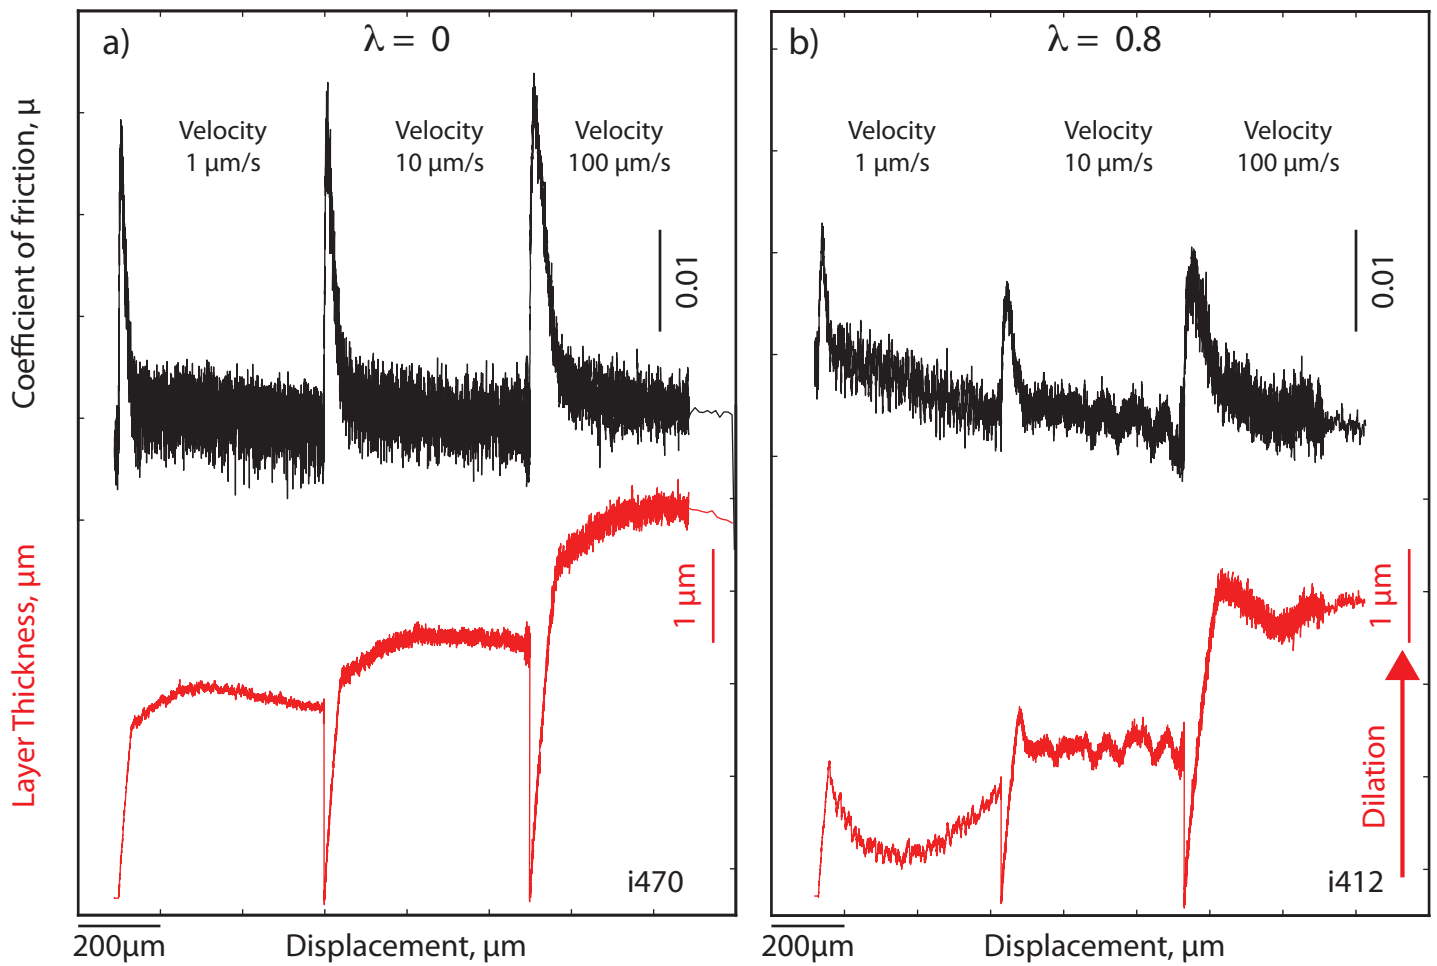

**Extended Data Figure 3.** Evolution of friction (black) and layer thickness (red) during velocity steps for experiments conducted at (a)  $\lambda = 0$  and (b)  $\lambda = 0.8$  and the same effective normal stress of 3 MPa.

| Exp. Num. | Gouge Material  | $\sigma_n$ (MPa) | $P_c$ (MPa) | $P_f$ (MPa)    | $\sigma'_n$ (MPa) | $\lambda$ ( $P_f / \sigma_n$ ) | Velocity Steps ( $\mu\text{m/s}$ ) | ( $a-b$ )                        | $D_c$                      |
|-----------|-----------------|------------------|-------------|----------------|-------------------|--------------------------------|------------------------------------|----------------------------------|----------------------------|
| i274      | Carrara Marble  | 2                | 19          | 18             | 3                 | 0.85                           | 10 – 1<br>1 – 10<br>10 – 100       | 0.002489<br>5.3e-5<br>0.001355   | 17.788<br>11.738<br>27.846 |
| i412      | Carrara Marble  | 2                | 19          | 18             | 3                 | 0.85                           | 0.1 – 1<br>1 – 10<br>10 – 100      | 0.002155<br>0.000422<br>0.001268 | 13.399<br>27.318<br>30.174 |
| i413      | Carrara Marble  | 2                | 4           | 2.5            | 3                 | 0.5                            | 0.1 – 1<br>1 – 10<br>10 – 100      | 0.000334<br>0.002464<br>0.003044 | 14.178<br>15.655<br>25.168 |
| i470      | Carrara Marble  | 3                | 0           | 0<br>Saturated | 3                 | 0                              | 0.1 – 1<br>1 – 10<br>10 – 100      | 0.004352<br>0.003571<br>0.002752 | 13.682<br>21.669<br>36.079 |
| i303      | Carrara Marble  | 2                | 19          | 11             | 10                | 0.5                            | 0.1 – 1<br>1 – 10<br>10 – 100      | 0.003505<br>0.004021<br>0.003561 | 20.469<br>32.189<br>37.886 |
| i475      | Carrara Marble  | 2                | 19          | 3              | 18                | 0.14                           | 0.1 – 1<br>1 – 10<br>10 – 100      | 0.002727<br>0.003553<br>0.003542 | 49.180<br>43.817<br>104.94 |
| i273      | Carrara Marble  | 2                | 19          | 3              | 18                | 0.14                           | 10 – 1<br>1 – 10<br>10 – 100       | 0.003200<br>0.003442<br>0.009416 | 50.345<br>59.750<br>50.823 |
| i355      | Carrara Marble  | 5                | 30          | 28             | 7                 | 0.8                            | 0.1 – 1<br>1 – 10<br>10 – 100      | -0.00061<br>0.001056<br>0.002788 | 39.841<br>53.309<br>63.014 |
| i359      | Carrara Marble  | 5                | 30          | 18             | 17                | 0.5                            | 0.1 – 1<br>1 – 10<br>10 – 100      | 0.001075<br>0.004223<br>0.004320 | 50.885<br>51.968<br>58.870 |
| i358      | Carrara Marble  | 5                | 30          | 5              | 30                | 0.14                           | 0.1 – 1<br>1 – 10<br>10 – 100      | 0.003707<br>0.003186<br>0.005867 | 72.658<br>95.465<br>73.544 |
| i305      | Limestone Gouge | 2                | 19          | 18             | 3                 | 0.85                           | 0.1 – 1<br>1 – 10<br>10 – 100      | 0.000914<br>3.80e-05<br>0.000253 | 6.2066<br>6.7239<br>26.281 |
| i324      | Limestone Gouge | 2                | 19          | 11             | 10                | 0.5                            | 0.1 – 1<br>1 – 10<br>10 – 100      | 0.000591<br>0.001266<br>0.003726 | 37.667<br>44.377<br>60.479 |
| i304      | Limestone Gouge | 2                | 19          | 3              | 18                | 0.14                           | 0.1 – 1<br>1 – 10<br>10 – 100      | 0.001912<br>0.002072<br>0.005374 | 87.908<br>93.415<br>86.515 |

**Extended Data Table 1.** Summary of experiments and boundary conditions
